# Supplementary material
Source: HighWire-hosted journal article supplement (https://www.ijssurgery.com/content/17/1/139)
Supplement: inline-supplementary-material-1 [file inline-supplementary-material-1.docx]

| **Appendix Table. 1 Inclusion and Exclusion Codes** | |
| --- | --- |
| **Primary Spine Fusion** | ICD-9-CM: 81.00-08 |
| **Revision Spine Fusion** | ICD-9-CM: 81.30-38 |
| **Spinal Trauma** | ICD-9-CM: 805.10, 805.2-5, 805.8-9, 806.00, 806.04-05, 806.4-5, 806.8-9, 905.1 |
| **Spinal Neoplasm** | ICD-9-CM: 192.2, 198.3, 225.3, 237.5 |
| **Spinal Infection** | ICD-9-CM: 324.1, 324.9 |

| **Appendix Table. 2 Postoperative Outcome Codes** | |
| --- | --- |
| **Pulmonary Embolus** | ICD-9-CM: 415.11-415.13, 415.19 |
| **Pneumonia** | ICD-9-CM: 480.0-3, 480.8-9, 481, 482.0-2, 482.30-32, 482.39-42, 482.49, 482.81-84, 482.89, 482.9, 483.0-1, 483.8, 485, 486, 997.31-32 |
| **CVA** | ICD-9-CM: 434.01, 434.11, 434.91, 436, 997.02 |
| **Myocardial Infarction** | ICD-9-CM: 410.00-01, 410.10-11, 410.20-21, 410.30-31, 410.40-41 410.50-51, 410.60-61 410.70-71, 410.80-81, 410.90-91, 997.1 |
| **Sepsis** | ICD-9-CM: 995.91-92 |
| **AKI** | ICD-9-CM: 584.5, 584.9 |
| **UTI** | ICD-9-CM: 599.0 |
| **Wound Complications** | ICD-9-CM: 998.12-13, 998.30-32, 998.51, 998.59, 998.83 |
| **Transfusion** | ICD-9-CM: 99.00-09 |
| **DVT** | ICD-9-CM: 453.40-42 |
| **Reoperation** | ICD-9-CM: 81.06-08, 81.37, 84.65 |
| *DVT, Deep Vein Thrombosis; CVA, Cerebrovascular Accident; UTI, Urinary Tract Infection; AKI, Acute Kidney Injury* | |
